# Supplementary material for: Tumor Infiltrating Lymphocytes Affect the Outcome of Patients with Operable Triple-Negative Breast Cancer in Combination with Mutated Amino Acid Classes
Source: PubMed Central journal article supplement (PMC5042538; doi:10.1371/journal.pone.0163138), 2016-09-29
Supplement: pone.0163138.s002.pdf [file pone.0163138.s002.pdf]

**TABLE S1: Patients examined in the present study had participated in the listed adjuvant trials by HeCOG**

| Trial                                                                                                                                         | Phase/Type of study | Accrual period | N     | n   | Treatment schedule                                                                                                                                                                                                                                                                                                                                                                                                                                                                                                                                                                                                                                                                                                                                                                                                                                                                                                                                                                                                                                                                                                                                                                                                                                                                                                                                                                                                                                                                                                                                                                                                                                                                                                                                                                                                                                   | Eligibility criteria                                                                                                                                                                                                                                                                                                                                                                                                                                                                                                                                                                                                                                                                                                                                                                                                                                                       | Reference                                                                                                                                                                                                                                                                                                               |
|-----------------------------------------------------------------------------------------------------------------------------------------------|---------------------|----------------|-------|-----|------------------------------------------------------------------------------------------------------------------------------------------------------------------------------------------------------------------------------------------------------------------------------------------------------------------------------------------------------------------------------------------------------------------------------------------------------------------------------------------------------------------------------------------------------------------------------------------------------------------------------------------------------------------------------------------------------------------------------------------------------------------------------------------------------------------------------------------------------------------------------------------------------------------------------------------------------------------------------------------------------------------------------------------------------------------------------------------------------------------------------------------------------------------------------------------------------------------------------------------------------------------------------------------------------------------------------------------------------------------------------------------------------------------------------------------------------------------------------------------------------------------------------------------------------------------------------------------------------------------------------------------------------------------------------------------------------------------------------------------------------------------------------------------------------------------------------------------------------|----------------------------------------------------------------------------------------------------------------------------------------------------------------------------------------------------------------------------------------------------------------------------------------------------------------------------------------------------------------------------------------------------------------------------------------------------------------------------------------------------------------------------------------------------------------------------------------------------------------------------------------------------------------------------------------------------------------------------------------------------------------------------------------------------------------------------------------------------------------------------|-------------------------------------------------------------------------------------------------------------------------------------------------------------------------------------------------------------------------------------------------------------------------------------------------------------------------|
| HE10/97<br><br>Australian New Zealand Clinical Trials Registry<br>ACTRN12611000506998                                                         | Phase III           | 1997 - 2000    | 595   | 309 | <b>E-T-CMF:</b> Epirubicin 110 mg/m <sup>2</sup> q 2 weeks x 3 followed by paclitaxel 250 mg/m <sup>2</sup> q 2 weeks x 3 followed by cyclophosphamide 840 mg/m <sup>2</sup> ; methotrexate 57 mg/m <sup>2</sup> ; fluorouracil 840 mg/m <sup>2</sup> (CMF) q 2 weeks x 3. GCSF support in all cycles. vs. <b>E-CMF:</b> Epirubicin 110 mg/m <sup>2</sup> q 2 weeks x 4 followed by CMF q 2 weeks x 4. GCSF support in all cycles.<br><br>Patients with ER/PgR-positive tumors received tamoxifen 20 mg daily for five years. Premenopausal patients received additional treatment with an LH-RH analog for two years. All patients who underwent partial mastectomy or with tumors >5 cm and/or with ≥4 infiltrated axillary nodes, irrespectively of the type of surgery, were irradiated. Radiation therapy and hormonal therapy were administered after the completion of chemotherapy.                                                                                                                                                                                                                                                                                                                                                                                                                                                                                                                                                                                                                                                                                                                                                                                                                                                                                                                                                          | Eligible were women with: histologically confirmed epithelial breast cancer; pathological stage T1-3 N1 M0 or T3 N0 M0 [14]; Eastern Cooperative Oncology Group performance status 0-1; normal cardiac function; and adequate bone marrow, hepatic and renal function.                                                                                                                                                                                                                                                                                                                                                                                                                                                                                                                                                                                                     | Fountzilas G, Skarlos D, et al. Postoperative dose-dense sequential chemotherapy with epirubicin, followed by CMF with or without paclitaxel, in patients with high-risk operable breast cancer: a randomized phase III study conducted by the Hellenic Cooperative Oncology Group. Ann Oncol. 2005 Nov;16(11):1762-71. |
| HE10/00<br><br>Australian New Zealand Clinical Trials Registry<br>ACTRN-12609001036202                                                        | Phase III           | 2000 - 2005    | 1,086 | 782 | <b>E-T-CMF:</b> As in the HE10/97 trial. vs. <b>ET-CMF:</b> Epirubicin 83 mg/m <sup>2</sup> + Paclitaxel 187 mg/m <sup>2</sup> q 3 weeks x 4 followed by cyclophosphamide 840 mg/m <sup>2</sup> ; methotrexate 57 mg/m <sup>2</sup> ; fluorouracil 840 mg/m <sup>2</sup> (CMF) q 2 weeks x 3. GCSF support in all cycles.<br><br>Premenopausal patients received hormonal therapy as in the HE10/97 trial. Postmenopausal patients received tamoxifen 20 mg daily for 2-3 years followed 2-3 years of daily exemestane 25 mg. Criteria for irradiation were the same as in the HE10/97 trial.                                                                                                                                                                                                                                                                                                                                                                                                                                                                                                                                                                                                                                                                                                                                                                                                                                                                                                                                                                                                                                                                                                                                                                                                                                                        | Eligible were women with: histologically confirmed epithelial breast cancer; pathological stage T1-4 N1-2 M0; Eastern Cooperative Oncology Group performance status 0-1; normal cardiac function and adequate bone marrow, hepatic and renal function.                                                                                                                                                                                                                                                                                                                                                                                                                                                                                                                                                                                                                     | Gogas H, Dafni U, et al. Postoperative dose-dense sequential versus concomitant administration of epirubicin and paclitaxel in patients with node-positive breast cancer: 5-year results of the Hellenic Cooperative Oncology Group HE 10/00 phase III Trial. Breast Cancer Res Treat. 2012 Apr;132(2):609-19.          |
| HE10/04 (A)<br><br>HeCOG Protocol Review Committee and the Bioethics Committee of the Aristotle University of Thessaloniki School of Medicine | Feasibility Study   | 2004-2005      | 44    |     | <b>E-CMF-D:</b> Epirubicin 110 mg/m <sup>2</sup> q 2 weeks x 3 followed by CMF cyclophosphamide; 840 mg/m <sup>2</sup> , methotrexate; 57 mg/m <sup>2</sup> and fluorouracil; 840 mg/m <sup>2</sup> q 2 weeks x 3 followed 3 weeks later by Docetaxel 35 mg/m <sup>2</sup> q week x 9                                                                                                                                                                                                                                                                                                                                                                                                                                                                                                                                                                                                                                                                                                                                                                                                                                                                                                                                                                                                                                                                                                                                                                                                                                                                                                                                                                                                                                                                                                                                                                | Eligible were women with: histologically confirmed epithelial breast cancer; pathological stage T1-3 N1 M0 or high-risk N0 patients; Eastern Cooperative Oncology Group performance status 0-1; normal cardiac function and adequate bone marrow, hepatic and renal function                                                                                                                                                                                                                                                                                                                                                                                                                                                                                                                                                                                               | Fountzilas G, Pectasides D, et al. Adjuvant dose-dense sequential chemotherapy with epirubicin, CMF and weekly docetaxel is feasible and safe in patients with operable breast cancer. Medical Oncology 2006; 23 (4):479-488                                                                                            |
| HE10/04 (B)<br><br>HeCOG Protocol Review Committee and the Bioethics Committee of the Aristotle University of Thessaloniki School of Medicine | Feasibility Study   | 2005           | 45    |     | <b>E-CMF-T:</b> Epirubicin q 2 weeks x 3 followed by intensified CMF q 2 weeks x 3 followed 3 weeks later by paclitaxel q week x 9                                                                                                                                                                                                                                                                                                                                                                                                                                                                                                                                                                                                                                                                                                                                                                                                                                                                                                                                                                                                                                                                                                                                                                                                                                                                                                                                                                                                                                                                                                                                                                                                                                                                                                                   | Eligible were women with: histologically confirmed epithelial breast cancer; pathological stage T1-3 N1 M0 or high-risk N0 patients; Eastern Cooperative Oncology Group performance status 0-1; normal cardiac function and adequate bone marrow, hepatic and renal function                                                                                                                                                                                                                                                                                                                                                                                                                                                                                                                                                                                               | Papadimitriou C, Papakostas P, et al. Adjuvant dose-dense sequential chemotherapy with epirubicin, CMF and weekly paclitaxel in patients with resected high-risk breast cancer: A Hellenic Cooperative Oncology Group (HeCOG) study. Cancer Investigation 2008; 26: 491-498                                             |
| HE10/05<br><br>Australian New Zealand Clinical Trials Registry<br>ACTRN-12610000151033                                                        | Phase III           | 2005 - 2008    | 990   | 793 | <b>E-T-CMF:</b> Epirubicin 110 mg/m <sup>2</sup> q 2 weeks x 3 followed by paclitaxel 200 mg/m <sup>2</sup> q 2 weeks x 3 followed by cyclophosphamide 840 mg/m <sup>2</sup> ; methotrexate 57 mg/m <sup>2</sup> ; fluorouracil 840 mg/m <sup>2</sup> (CMF) q 2 weeks x 3. GCSF support in all cycles.<br><br><b>vs. E-CMF-wD:</b> Epirubicin 110 mg/m <sup>2</sup> q 2 weeks x 3 followed by CMF q 2 weeks x 3 followed by weekly Docetaxel 35 mg/m <sup>2</sup> x 9<br><br><b>vs. E-CMF-wT</b> Epirubicin 110 mg/m <sup>2</sup> q 2 weeks x 3 followed by CMF q 2 weeks x 3 followed by weekly paclitaxel 80 mg/m <sup>2</sup> x 9. GCSF support in all cycles in E-T-CMF and during the intensified phase of epirubicin and CMF treatments in E-CMF-wD and E-CMF-wT arms.<br><br>Premenopausal patients received hormonal therapy as in the HE10/97 trial. Postmenopausal patients received anastrozole 1 mg daily for 5 years followed 2-3 years of daily exemestane 25 mg. Criteria for irradiation were the same as in the HE10/97 trial.<br><br>Patients with HER2-positive tumors were treated with trastuzumab, initially at a dose of 8 mg/kg as a loading dose, and subsequently 6 mg/kg every three weeks for one year. Initially, HER2-positive tumors were considered those with an immunohistochemistry (IHC) score of 3+ (uniform, intense membrane staining of >10% of invasive tumor cells), a fluorescence in situ hybridization (FISH) result of ≥6 HER2 gene copies, or a FISH ratio (HER2 gene signals to chromosome 17 signals) of >2.0. Following the 2007 publication of the American Society of Clinical Oncology/College of American Pathologists guideline recommendations for HER2 testing in breast cancer, the criteria for characterizing a tumor as HER2-positive were updated (the FISH ratio was changed to >2.2) | Eligible women were older than 18 years with histologically confirmed node-positive (T1-3 N1 M0) or "intermediate risk" according to the 2005 St. Gallen criteria (node negative patients with at least one of the following features: pT > 2 cm, or histological and/or nuclear grade 2-3, or presence of peritumoral vascular invasion, or HER2 gene overexpression and/or amplification, or age <35 years) adenocarcinoma of the breast. Patients had to have breast-conserving surgery with tumor-free margins or modified radical mastectomy, adequate hematologic, hepatic and renal function, performance status of 0 to 1 of the Eastern Cooperative Oncology Group (ECOG) scale, without evidence of significant cardiac disease (a normal left ventricular ejection fraction [LVEF] demonstrated by a Multiple Gated Acquisition [MUGA] scan or echocardiogram). | Fountzilas G, Dafni U, et al. Dose-dense sequential adjuvant chemotherapy followed, as indicated, by trastuzumab for one year in patients with early breast cancer: first report at 5-year median follow-up of a Hellenic Cooperative Oncology Group randomized phase III trial. BMC Cancer. 2014 Jul 15;14:515.        |
| HE10/08<br><br>Australian New Zealand Clinical Trials Registry<br>ACTRN-12615000161527                                                        | Observational Study | 2008 - 2010    | 780   | 707 | <b>E-T-CMF:</b> Epirubicin 110 mg/m <sup>2</sup> q 2 weeks x 3 followed by paclitaxel 200 mg/m <sup>2</sup> q 2 weeks x 3 followed by cyclophosphamide 840 mg/m <sup>2</sup> ; methotrexate 57 mg/m <sup>2</sup> ; fluorouracil 840 mg/m <sup>2</sup> (CMF) q 2 weeks x 3. GCSF support in all cycles.<br><br>Hormonal therapy as in HE10/05. Patients with HER2-positive tumors were treated with trastuzumab as in HE10/05.<br><br>Criteria for irradiation were the same as in the HE10/97 trial.                                                                                                                                                                                                                                                                                                                                                                                                                                                                                                                                                                                                                                                                                                                                                                                                                                                                                                                                                                                                                                                                                                                                                                                                                                                                                                                                                 | Eligibility criteria as in HE10/05 trial                                                                                                                                                                                                                                                                                                                                                                                                                                                                                                                                                                                                                                                                                                                                                                                                                                   |                                                                                                                                                                                                                                                                                                                         |
| HE10/10<br><br>Australian New Zealand Clinical Trials Registry<br>ACTRN-12616001043426                                                        | Observational Study | 2010-2013      | 1054  |     | <b>EC+D:</b> Epirubicin 75 mg/m <sup>2</sup> + Cyclophosphamide 600 mg/m <sup>2</sup> x 4 cycles q 2 weeks followed by Docetaxel 100 mg/m <sup>2</sup> x 4 cycles q 3 weeks                                                                                                                                                                                                                                                                                                                                                                                                                                                                                                                                                                                                                                                                                                                                                                                                                                                                                                                                                                                                                                                                                                                                                                                                                                                                                                                                                                                                                                                                                                                                                                                                                                                                          | Eligibility criteria as in HE10/05 trial                                                                                                                                                                                                                                                                                                                                                                                                                                                                                                                                                                                                                                                                                                                                                                                                                                   |                                                                                                                                                                                                                                                                                                                         |

N, number of patients enrolled in the trials; n, number of patients included in the current study with tumor tissue blocks available
