# Supplementary material for: Tumor Infiltrating Lymphocytes Affect the Outcome of Patients with Operable Triple-Negative Breast Cancer in Combination with Mutated Amino Acid Classes
Source: PubMed Central journal article supplement (PMC5042538; doi:10.1371/journal.pone.0163138), 2016-09-29
Supplement: pone.0163138.s003.pdf [file pone.0163138.s003.pdf]

TABLE S2: Patient and tumor characteristics in the group with paired samples

|                             | TNBC both   |
|-----------------------------|-------------|
| <b>Patients</b>             |             |
| N                           | 82          |
| <b>Age (years)</b>          |             |
| Mean (SD)                   | 53.4 (11.6) |
| Median                      | 55,4        |
| Min-Max                     | 21-74       |
| <b>Ki67</b>                 |             |
| Mean (SD)                   | 55.9 (31.3) |
| Median                      | 57,5        |
| Min-Max                     | 0-100       |
|                             | N (%)       |
| <b>Age (years)</b>          |             |
| ≤50                         | 30 (36.6)   |
| >50                         | 52 (63.4)   |
| <b>Menopausal status</b>    |             |
| Postmenopausal              | 48 (58.6)   |
| Premenopausal               | 34 (41.4)   |
| <b>Tumor size</b>           |             |
| ≤2                          | 29 (35.4)   |
| >2                          | 53 (64.6)   |
| <b>Positive lymph nodes</b> |             |
| 0-3                         | 58 (70.8)   |
| ≥4                          | 24 (29.2)   |
| <b>Histological grade</b>   |             |
| I                           | 3 (3.6)     |
| II                          | 8 (9.8)     |
| III                         | 71 (86.6)   |
| <b>Histological type</b>    |             |
| Medullary                   | 9 (11.0)    |
| NST                         | 54 (65.8)   |
| Other                       | 19 (23.2)   |
| <b>Surgery (binary)</b>     |             |
| MRM                         | 39 (47.6)   |
| Other                       | 43 (52.4)   |
| <b>Hormonotherapy</b>       |             |
| No                          | 71 (86.6)   |
| Yes                         | 11 (13.4)   |
| <b>Radiotherapy</b>         |             |
| No                          | 21 (25.6)   |
| Yes                         | 61 (74.4)   |
| <b>ER/PgR/HER2 local</b>    |             |
| either positive             | 4 (4.8)     |
| TNBC                        | 78 (95.2)   |
| <b>ER/PgR/HER2 central</b>  |             |
| either positive             | 23 (28.1)   |
| TNBC                        | 54 (65.8)   |
| At least one not assessed   | 5 (6.1)     |
| <b>Basal</b>                |             |
| Yes                         | 67 (83.8)   |
| No                          | 13 (16.2)   |
| <b>Survival data</b>        |             |
| Median FU in months         | 70          |
| N of valid cases            | 82          |
| Deaths, N                   | 16          |
| Event free at 3 years, %    | 91,3        |
| Event free at 5 years, %    | 80,4        |
| Relapse, N                  | 22          |
| Event free at 3 years, %    | 81,4        |
| Event free at 5 years, %    | 71,1        |

Notes: N: number; MRM: modified radical mastectomy;  
NST: non-specific type; FU: follow-up
