# Supplementary material for: Tumor Infiltrating Lymphocytes Affect the Outcome of Patients with Operable Triple-Negative Breast Cancer in Combination with Mutated Amino Acid Classes
Source: PubMed Central journal article supplement (PMC5042538; doi:10.1371/journal.pone.0163138), 2016-09-29
Supplement: pone.0163138.s004.pdf [file pone.0163138.s004.pdf]

**TABLE S3: Distribution of mutations in the tumours of the training cohort and of the subsets that emerged according to local/central evaluation in the validation cohort.**

|          | Training, concordant<br>TNBC, 94/133 (70.7%)<br>with mutations |               | Validation, concordant<br>TNBC, 61/93 (74.2%)<br>with mutations |               | Validation*, local TN /<br>central nonTN, 56/80<br>(70.0%) with mutations |               | Chi sq p-<br>value <sup>^</sup> |
|----------|----------------------------------------------------------------|---------------|-----------------------------------------------------------------|---------------|---------------------------------------------------------------------------|---------------|---------------------------------|
|          | N mutated % among<br>tumors mutated                            |               | N mutated % among<br>tumors mutated                             |               | N mutated % among<br>tumors mutated                                       |               |                                 |
|          |                                                                | <i>tumors</i> |                                                                 | <i>tumors</i> |                                                                           | <i>tumors</i> |                                 |
| AKT1     | 2                                                              | 2,1           | 4                                                               | 6,6           | 3                                                                         | 5,4           |                                 |
| APOBEC3B | 0                                                              |               | 2                                                               | 3,3           | 1                                                                         | 1,8           |                                 |
| ARID1B   | 2                                                              | 2,1           | 3                                                               | 4,9           | 1                                                                         | 1,8           |                                 |
| BRCA1    | 2                                                              | 2,1           | 1                                                               | 1,6           | 3                                                                         | 5,4           |                                 |
| BRCA2    | 0                                                              |               | 0                                                               |               | 1                                                                         | 1,8           |                                 |
| CCND1    | 5                                                              | 5,3           | 0                                                               |               | 2                                                                         | 3,6           |                                 |
| CDH1     | 12                                                             | 12,8          | 3                                                               | 4,9           | 3                                                                         | 5,4           |                                 |
| CDKN2A   | 0                                                              |               | 1                                                               | 1,6           | 1                                                                         | 1,8           |                                 |
| CHEK2    | 0                                                              |               | 0                                                               |               | 1                                                                         | 1,8           |                                 |
| E2F3     | 0                                                              |               | 1                                                               | 1,6           | 1                                                                         | 1,8           |                                 |
| EGFR     | 2                                                              | 2,1           | 2                                                               | 3,3           | 3                                                                         | 5,4           |                                 |
| ESR1     | 3                                                              | 3,2           | 0                                                               |               | 0                                                                         |               |                                 |
| FGFR1    | 0                                                              |               | 0                                                               |               | 1                                                                         | 1,8           |                                 |
| FGFR2    | 0                                                              |               | 0                                                               |               | 3                                                                         | 5,4           |                                 |
| FGFR3    | 0                                                              |               | 0                                                               |               | 1                                                                         | 1,8           |                                 |
| FOXM1    | 0                                                              |               | 2                                                               | 3,3           | 2                                                                         | 3,6           |                                 |
| GATA3    | 2                                                              | 2,1           | 5                                                               | 8,2           | 2                                                                         | 3,6           |                                 |
| MAP2K4   | 2                                                              | 2,1           | 2                                                               | 3,3           | 4                                                                         | 7,1           |                                 |
| MAP3K1   | 1                                                              | 1,1           | 3                                                               | 4,9           | 3                                                                         | 5,4           |                                 |
| MDM2     | 0                                                              |               | 2                                                               | 3,3           | 1                                                                         | 1,8           |                                 |
| MET      | 0                                                              |               | 3                                                               | 4,9           | 0                                                                         |               |                                 |
| MYC      | 0                                                              |               | 0                                                               |               | 0                                                                         |               |                                 |
| NCOR1    | 0                                                              |               | 2                                                               | 3,3           | 2                                                                         | 3,6           |                                 |
| NF1      | 0                                                              |               | 0                                                               |               | 1                                                                         | 1,8           |                                 |
| NOTCH1   | 0                                                              |               | 0                                                               |               | 1                                                                         | 1,8           |                                 |
| NOTCH4   | 1                                                              | 1,1           | 0                                                               |               | 1                                                                         | 1,8           |                                 |
| PALB2    | 1                                                              | 1,1           | 2                                                               | 3,3           | 1                                                                         | 1,8           |                                 |
| PIK3CA   | 11                                                             | 11,7          | 14                                                              | 23,0          | 16                                                                        | 28,5          | <0.001                          |
| PTEN     | 3                                                              | 3,2           | 4                                                               | 6,6           | 4                                                                         | 7,1           |                                 |
| RAD51C   | 0                                                              |               | 1                                                               | 1,6           | 1                                                                         | 1,8           |                                 |
| RB1      | 0                                                              |               | 1                                                               | 1,6           | 2                                                                         | 3,6           |                                 |
| TBX3     | 1                                                              | 1,1           | 2                                                               | 3,3           | 4                                                                         | 7,1           |                                 |
| TP53     | 77                                                             | 81,9          | 43                                                              | 70,5          | 34                                                                        | 60,7          | <0.001                          |
| VEGFA    | 1                                                              | 1,1           | 0                                                               |               | 1                                                                         | 1,8           |                                 |
| ZNF703   | 0                                                              |               | 1                                                               | 1,6           | 1                                                                         | 1,8           |                                 |

\*: mutation rates for the 17 cases that could not be re-assessed centrally are not shown; ^: comparison between training and local TN / central nonTN
