# Supplementary material for: Tumor Infiltrating Lymphocytes Affect the Outcome of Patients with Operable Triple-Negative Breast Cancer in Combination with Mutated Amino Acid Classes
Source: PubMed Central journal article supplement (PMC5042538; doi:10.1371/journal.pone.0163138), 2016-09-29
Supplement: pone.0163138.s005.pdf [file pone.0163138.s005.pdf]

**TABLE S4: Distribution of mutations in concordant and discordant TNBC for which paired samples were tested with two different panels.** These 82 tumors were tested twice centrally, at different time points; in 23 out of these, discordant phenotypes were obtained (TN / nonTN). TP53 and PIK3CA mutation rates were remarkably consistent in the two groups.

| <b>gene</b>   | <b>heterochronous<br/>concordant TNBC<br/>phenotype</b> | <b>heterochronous<br/>discordant TNBC<br/>phenotype</b> |
|---------------|---------------------------------------------------------|---------------------------------------------------------|
| AKT1          | 2                                                       | none                                                    |
| ARID1B        | 3                                                       | none                                                    |
| BRCA1         | 1                                                       | 1                                                       |
| CDH1          | 4                                                       | 2                                                       |
| CDKN2A        | 1                                                       | 1                                                       |
| ESR1          | none                                                    | 1                                                       |
| FGFR2         | none                                                    | 1                                                       |
| GATA3         | 3                                                       | 2                                                       |
| MAP2K4        | none                                                    | 1                                                       |
| MAP3K1        | 5                                                       | none                                                    |
| MET           | 1                                                       | none                                                    |
| NCOR1         | 4                                                       | none                                                    |
| PALB2         | none                                                    | 1                                                       |
| PIK3CA        | 14 (12.4%)                                              | 5 (10.9%)                                               |
| PTEN          | 2                                                       | 2                                                       |
| TP53          | 72 (63.7%)                                              | 32 (62.9%)                                              |
| VEGFA         | 1                                                       | 1                                                       |
| all mutations | 113                                                     | 46                                                      |
