# Supplementary material for: Tumor Infiltrating Lymphocytes Affect the Outcome of Patients with Operable Triple-Negative Breast Cancer in Combination with Mutated Amino Acid Classes
Source: PubMed Central journal article supplement (PMC5042538; doi:10.1371/journal.pone.0163138), 2016-09-29
Supplement: pone.0163138.s007.pdf [file pone.0163138.s007.pdf]

TABLE S6: Associations of TILs and mutated amino acid classes with histological types and with each other in the two study cohorts

| TRAINING COHORT                      |     |         |       |       | Chi-sq p-value | VALIDATION COHORT                   |     |         |       |       | Chi-sq p-value | BOTH COHORTS                        |     |         |       |       | Chi-sq p-value |
|--------------------------------------|-----|---------|-------|-------|----------------|-------------------------------------|-----|---------|-------|-------|----------------|-------------------------------------|-----|---------|-------|-------|----------------|
| Histo_Classification By TILs 3 scale | <5  | 5 to 50 | >50   | total |                | Histological type By TILs 3 scale   | <5  | 5 to 50 | >50   | total |                | Histological type By TILs 3scale    | <5  | 5 to 50 | >50   | total |                |
| apocrine                             | 0   | 1       | 0     | 1     | 0.79           | comedo                              | 0   | 1       | 0     | 1     | <0.001         | apocrine                            | 0   | 1       | 0     | 1     | 0.002          |
| invasive lobular                     | 1   | 2       | 0     | 3     |                | invasive ductal, NST                | 26  | 101     | 10    | 137   |                | comedo                              | 0   | 1       | 0     | 1     |                |
| medullary                            | 0   | 3       | 2     | 5     |                | invasive lobular                    | 5   | 3       | 1     | 9     |                | invasive lobular                    | 6   | 5       | 1     | 12    |                |
| medullary-like                       | 0   | 1       | 0     | 1     |                | medullary                           | 0   | 8       | 8     | 16    |                | medullary                           | 0   | 11      | 10    | 21    |                |
| metaplastic                          | 1   | 4       | 0     | 5     |                | mixed                               | 2   | 3       | 0     | 5     |                | medullary-like                      | 0   | 1       | 0     | 1     |                |
| invasive ductal, NST                 | 16  | 81      | 12    | 109   |                | Other                               | 3   | 8       | 0     | 11    |                | metaplastic                         | 1   | 4       | 0     | 5     |                |
| Other                                | 1   | 5       | 0     | 6     |                |                                     |     |         |       |       |                | invasive ductal, NST                | 42  | 182     | 22    | 246   |                |
| total                                | 19  | 97      | 14    | 130   |                | total                               | 36  | 124     | 19    | 179   |                | mixed                               | 2   | 3       | 0     | 5     |                |
|                                      |     |         |       |       |                |                                     |     |         |       |       |                | Other                               | 4   | 13      | 0     | 17    |                |
|                                      |     |         |       |       |                |                                     |     |         |       |       |                | total                               | 55  | 221     | 33    | 309   |                |
| Histological type By charged         | NO  | YES     | total |       |                | Histological type By charged        | NO  | YES     | total |       |                | Histological type By charged        | NO  | YES     | total |       |                |
| apocrine                             | 1   | 0       | 1     | 0.42  |                | comedo                              | 0   | 1       | 1     | 0.014 |                | apocrine                            | 1   | 0       | 1     | 0.004 |                |
| invasive lobular                     | 3   | 0       | 3     |       |                | invasive ductal, NST                | 118 | 30      | 148   |       |                | comedo                              | 0   | 1       | 1     |       |                |
| medullary                            | 5   | 0       | 5     |       |                | invasive lobular                    | 6   | 3       | 9     |       |                | invasive lobular                    | 9   | 3       | 12    |       |                |
| medullary-like                       | 1   | 0       | 1     |       |                | medullary                           | 15  | 1       | 16    |       |                | medullary                           | 20  | 1       | 21    |       |                |
| metaplastic                          | 3   | 2       | 5     |       |                | mixed                               | 2   | 3       | 5     |       |                | medullary-like                      | 1   | 0       | 1     |       |                |
| invasive ductal, NST                 | 85  | 27      | 112   |       |                | Other                               | 6   | 5       | 11    |       |                | metaplastic                         | 3   | 2       | 5     |       |                |
| Other                                | 3   | 3       | 6     |       |                | total                               | 147 | 43      | 190   |       |                | invasive ductal, NST                | 203 | 57      | 260   |       |                |
| total                                | 101 | 32      | 133   |       |                |                                     |     |         |       |       |                | mixed                               | 2   | 3       | 5     |       |                |
|                                      |     |         |       |       |                |                                     |     |         |       |       |                | Other                               | 9   | 8       | 17    |       |                |
|                                      |     |         |       |       |                |                                     |     |         |       |       |                | total                               | 248 | 75      | 323   |       |                |
| Histological type By polar           | NO  | YES     | total |       |                | Histological type By polar          | NO  | YES     | total |       |                | Histological type By polar          | NO  | YES     | total |       |                |
| apocrine                             | 1   | 0       | 1     | 0.33  |                | comedo                              | 1   | 0       | 1     | 0.35  |                | apocrine                            | 1   | 0       | 1     | 0.32  |                |
| invasive lobular                     | 2   | 1       | 3     |       |                | invasive ductal, NST                | 102 | 46      | 148   |       |                | comedo                              | 1   | 0       | 1     |       |                |
| medullary                            | 2   | 3       | 5     |       |                | invasive lobular                    | 6   | 3       | 9     |       |                | invasive lobular                    | 8   | 4       | 12    |       |                |
| medullary-like                       | 0   | 1       | 1     |       |                | medullary                           | 14  | 2       | 16    |       |                | medullary                           | 16  | 5       | 21    |       |                |
| metaplastic                          | 5   | 0       | 5     |       |                | mixed                               | 5   | 0       | 5     |       |                | medullary-like                      | 0   | 1       | 1     |       |                |
| invasive ductal, NST                 | 72  | 40      | 112   |       |                | Other                               | 9   | 2       | 11    |       |                | metaplastic                         | 5   | 0       | 5     |       |                |
| Other                                | 3   | 3       | 6     |       |                | total                               | 137 | 53      | 190   |       |                | invasive ductal, NST                | 174 | 86      | 260   |       |                |
| total                                | 85  | 48      | 133   |       |                |                                     |     |         |       |       |                | mixed                               | 5   | 0       | 5     |       |                |
|                                      |     |         |       |       |                |                                     |     |         |       |       |                | Other                               | 12  | 5       | 17    |       |                |
|                                      |     |         |       |       |                |                                     |     |         |       |       |                | total                               | 222 | 101     | 323   |       |                |
| Histological type By hydrophobic     | NO  | YES     | total |       |                | Histological type By hydrophobic    | NO  | YES     | total |       |                | Histological type By hydrophobic    | NO  | YES     | total |       |                |
| apocrine                             | 1   | 0       | 1     | 0.86  |                | comedo                              | 1   | 0       | 1     | 0.95  |                | apocrine                            | 1   | 0       | 1     | >0.99 |                |
| invasive lobular                     | 2   | 1       | 3     |       |                | invasive ductal, NST                | 123 | 25      | 148   |       |                | comedo                              | 1   | 0       | 1     |       |                |
| medullary                            | 3   | 2       | 5     |       |                | invasive lobular                    | 7   | 2       | 9     |       |                | invasive lobular                    | 9   | 3       | 12    |       |                |
| medullary-like                       | 1   | 0       | 1     |       |                | medullary                           | 14  | 2       | 16    |       |                | medullary                           | 17  | 4       | 21    |       |                |
| metaplastic                          | 4   | 1       | 5     |       |                | mixed                               | 4   | 1       | 5     |       |                | medullary-like                      | 1   | 0       | 1     |       |                |
| invasive ductal, NST                 | 90  | 22      | 112   |       |                | Other                               | 10  | 1       | 11    |       |                | metaplastic                         | 4   | 1       | 5     |       |                |
| Other                                | 4   | 2       | 6     |       |                | total                               | 159 | 31      | 190   |       |                | invasive ductal, NST                | 213 | 47      | 260   |       |                |
| total                                | 105 | 28      | 133   |       |                |                                     |     |         |       |       |                | mixed                               | 4   | 1       | 5     |       |                |
|                                      |     |         |       |       |                |                                     |     |         |       |       |                | Other                               | 14  | 3       | 17    |       |                |
|                                      |     |         |       |       |                |                                     |     |         |       |       |                | total                               | 264 | 59      | 323   |       |                |
| charged By TILs 3scale               | <5  | 5 to 50 | >50   | total |                | charged By TILs 3scale              | <5  | 5 to 50 | >50   | total |                | charged By TILs 3scale              | <5  | 5 to 50 | >50   | total |                |
| NO                                   | 15  | 70      | 13    | 98    | 0.23           | NO                                  | 26  | 96      | 17    | 139   | 0.34           | NO                                  | 41  | 166     | 30    | 237   | 0.12           |
| YES                                  | 4   | 27      | 1     | 32    |                | YES                                 | 10  | 28      | 2     | 40    |                | YES                                 | 14  | 55      | 3     | 72    |                |
| total                                | 19  | 97      | 14    | 130   |                | total                               | 36  | 124     | 19    | 179   |                | total                               | 55  | 221     | 33    | 309   |                |
| polar By TILs 3scale                 | <5  | 5 to 50 | >50   | total |                | polar By TILs 3scale                | <5  | 5 to 50 | >50   | total |                | polar By TILs 3scale                | <5  | 5 to 50 | >50   | total |                |
| NO                                   | 13  | 61      | 8     | 82    | 0.80           | NO                                  | 29  | 84      | 16    | 129   | 0.15           | NO                                  | 42  | 145     | 24    | 211   | 0.28           |
| YES                                  | 6   | 36      | 6     | 48    |                | YES                                 | 7   | 40      | 3     | 50    |                | YES                                 | 13  | 76      | 9     | 98    |                |
| total                                | 19  | 97      | 14    | 130   |                | total                               | 36  | 124     | 19    | 179   |                | total                               | 55  | 221     | 33    | 309   |                |
| hydrophobic By TILs 3scale           | <5  | 5 to 50 | >50   | total |                | hydrophobic By TILs 3scale          | <5  | 5 to 50 | >50   | total |                | hydrophobic By TILs 3scale          | <5  | 5 to 50 | >50   | total |                |
| NO                                   | 10  | 84      | 10    | 104   | 0.002          | NO                                  | 31  | 100     | 17    | 148   | 0.53           | NO                                  | 41  | 184     | 27    | 252   | 0.32           |
| YES                                  | 9   | 13      | 4     | 26    |                | YES                                 | 5   | 24      | 2     | 31    |                | YES                                 | 14  | 37      | 6     | 57    |                |
| total                                | 19  | 97      | 14    | 130   |                | total                               | 36  | 124     | 19    | 179   |                | total                               | 55  | 221     | 33    | 309   |                |
| MUT amino acid class By TILs 3 scale | <5  | 5 to 50 | >50   | total |                | MUT amino acid class By TILs 3scale | <5  | 5 to 50 | >50   | total |                | MUT amino acid class By TILs 3scale | <5  | 5 to 50 | >50   | total |                |
| all                                  | 1   | 0       | 1     | 2     | 0.039          | all                                 | 0   | 7       | 0     | 7     | 0.36           | all                                 | 1   | 7       | 1     | 9     | 0.34           |
| charged                              | 0   | 15      | 0     | 15    |                | charged                             | 7   | 13      | 1     | 21    |                | charged                             | 7   | 28      | 1     | 36    |                |
| charged&polar                        | 2   | 7       | 0     | 9     |                | charged&polar                       | 2   | 6       | 1     | 9     |                | charged&polar                       | 4   | 13      | 1     | 18    |                |
| hydro&charged                        | 1   | 3       | 0     | 4     |                | hydro & charged                     | 1   | 2       | 0     | 3     |                | hydro & charged                     | 2   | 5       | 0     | 7     |                |
| hydro&polar                          | 1   | 3       | 1     | 5     |                | hydro & polar                       | 2   | 1       | 1     | 4     |                | hydro & polar                       | 3   | 4       | 2     | 9     |                |
| hydrophobic                          | 6   | 7       | 2     | 15    |                | hydrophobic                         | 2   | 14      | 1     | 17    |                | hydrophobic                         | 8   | 21      | 3     | 32    |                |
| no mutation                          | 4   | 29      | 6     | 39    |                | no mutation                         | 14  | 36      | 10    | 60    |                | no mutation                         | 18  | 65      | 16    | 99    |                |
| nonsense                             | 2   | 5       | 0     | 7     |                | nonsense                            | 5   | 19      | 4     | 28    |                | nonsense                            | 7   | 24      | 4     | 35    |                |
| polar                                | 2   | 28      | 4     | 34    |                | polar                               | 3   | 26      | 1     | 30    |                | polar                               | 5   | 54      | 5     | 64    |                |
| total                                | 19  | 97      | 14    | 130   |                | total                               | 36  | 124     | 19    | 179   |                | total                               | 55  | 221     | 33    | 309   |                |
