# Supplementary material for: Tumor Infiltrating Lymphocytes Affect the Outcome of Patients with Operable Triple-Negative Breast Cancer in Combination with Mutated Amino Acid Classes
Source: PubMed Central journal article supplement (PMC5042538; doi:10.1371/journal.pone.0163138), 2016-09-29
Supplement: pone.0163138.s008.pdf [file pone.0163138.s008.pdf]

**TABLE S7: Comparison of the two study cohorts for the impact of clinicopathological parameters on DFS**

| Parameter                              | Categories        | TRAINING cohort, n patients: 133 |           |      |           |              | VALIDATION cohort, n patients: 190 |           |      |            |              |
|----------------------------------------|-------------------|----------------------------------|-----------|------|-----------|--------------|------------------------------------|-----------|------|------------|--------------|
|                                        |                   | N patients                       | N events  | HR   | 95% CI    | Wald's p     | N patients                         | N events  | HR   | 95% CI     | Wald's p     |
| Age                                    | >50 vs. ≤50       | 65 vs. 68                        | 20 vs. 24 | 0.83 | 0.46-1.51 | 0.55         | 116 vs. 74                         | 33 vs. 14 | 1.61 | 0.86-3.01  | 0.14         |
| Histological grade                     | III vs. I-II      | 111 vs. 22                       | 39 vs. 5  | 1.74 | 0.68-4.41 | 0.24         | 150 vs. 40                         | 32 vs. 15 | 0.54 | 0.29-1.00  | 0.051        |
| Histological type                      | all other vs. NST | 21 vs. 112                       | 5 vs. 39  | 0.63 | 0.25-1.59 | 0.32         | 42 vs. 148                         | 9 vs. 38  | 0.82 | 0.39-1.69  | 0.59         |
| Hormonotherapy                         | Yes vs. No        | 26 vs. 107                       | 13 vs. 31 | 1.7  | 0.89-3.25 | 0.11         | 28 vs. 160                         | 6 vs. 40  | 0.64 | 0.27-1.54  | 0.32         |
| Menopausal status                      | post vs. pre      | 64 vs. 69                        | 19 vs. 25 | 0.78 | 0.43-1.42 | 0.43         | 103 vs. 87                         | 27 vs. 20 | 1.13 | 0.63-2.01  | 0.68         |
| Radiotherapy                           | Yes vs. No        | 99 vs. 34                        | 31 vs. 13 | 0.76 | 0.40-1.46 | 0.42         | 142 vs. 44                         | 35 vs. 11 | 1.01 | 0.51-2.00  | 0.97         |
| Tumor size                             | >2 vs. ≤2         | 89 vs. 43                        | 33 vs. 11 | 1.81 | 0.92-3.59 | 0.088        | 118 vs. 72                         | 36 vs. 11 | 2.19 | 1.12-4.31  | <b>0.023</b> |
| Nodes ≥4 vs. 0-3                       |                   | 39 vs. 91                        | 21 vs. 22 | 2.81 | 1.54-5.11 | <b>0.001</b> | 68 vs. 122                         | 28 vs. 19 | 2.78 | 1.55-5.00  | <b>0.001</b> |
| TILs cut off at 50%, LPBC vs. non-LPBC |                   | 14 vs. 116                       | 3 vs. 39  | 0.58 | 0.18-1.87 | 0.36         | 19 vs. 160                         | 0 vs. 41  | 0.09 | 0.01-1.52  | 0.095        |
| TILs, 3 scale                          |                   |                                  |           |      |           |              |                                    |           |      |            |              |
| LPBC vs. TILs 5-50%                    |                   | 14 vs. 97                        | 3 vs. 31  | 0.62 | 0.19-2.03 | 0.43         | 19 vs. 124                         | 0 vs. 26  | 0.11 | <0.01-1.93 | 0.13         |
| LPBC vs. TILs <5%                      |                   | 14 vs. 22                        | 3 vs. 10  | 0.39 | 0.11-1.42 | 0.15         | 19 vs. 47                          | 0 vs. 21  | 0.05 | <0.01-0.84 | <b>0.037</b> |
| TILs 5-50% vs. TILs <5%                |                   | 97 vs. 22                        | 31 vs. 10 | 0.63 | 0.31-1.29 | 0.2          | 124 vs. 47                         | 26 vs. 21 | 0.43 | 0.24-0.77  | <b>0.004</b> |
| TILs continuous (incr. by 5%)          |                   | -                                | -         | 0.92 | 0.84-1.01 | 0.085        | -                                  | -         | 0.86 | 0.76-0.97  | <b>0.011</b> |

HR: hazard ratio; bold letters: statistically significant results
