# Supplementary material for: Tumor Infiltrating Lymphocytes Affect the Outcome of Patients with Operable Triple-Negative Breast Cancer in Combination with Mutated Amino Acid Classes
Source: PubMed Central journal article supplement (PMC5042538; doi:10.1371/journal.pone.0163138), 2016-09-29
Supplement: pone.0163138.s009.pdf [file pone.0163138.s009.pdf]

**TABLE S8: Univariate Cox analysis for nodal status, TILs density and mutated amino acid class in the two study cohorts**

|                                                  | TRAINING COHORT |           |                |            |              | VALIDATION COHORT |           |                |           |              |
|--------------------------------------------------|-----------------|-----------|----------------|------------|--------------|-------------------|-----------|----------------|-----------|--------------|
|                                                  | N patients      | N events  | HR             | 95% CI     | Wald's p     | N patients        | N events  | HR             | 95% CI    | Wald's p     |
| hydrophobic vs. no mutation                      | 17 vs. 39       | 10 vs. 7  | 5.13           | 1.95-13.52 | <0.001       | 17 vs. 63         | 6 vs. 13  | 1.81           | 0.69-4.78 | 0.23         |
| hydrophobic vs. all other mutation               | 17 vs. 77       | 10 vs. 27 | 2.43           | 1.17-5.03  | <b>0.017</b> | 17 vs. 110        | 6 vs. 28  | 1.49           | 0.61-3.59 | 0.38         |
| all other mut vs. no mutation                    | 77 vs. 39       | 27 vs. 7  | 2.12           | 0.92-4.86  | 0.078        | 110 vs. 63        | 28 vs. 13 | 1.22           | 0.63-2.36 | 0.55         |
| non-LPBC, 0-3 LN (all hydrophobic vs. all other) | 13 vs. 65       | 5 vs. 13  | 2.72           | 0.97-7.67  | 0.058        | 16 vs. 91         | 4 vs. 14  | 1.63           | 0.54-4.97 | 0.39         |
| non-LPBC, ≥4 LN (all hydrophobic vs. all other)  | 8 vs. 27        | 6 vs. 14  | 2.22           | 0.85-5.82  | 0.11         | 6 vs. 47          | 4 vs. 19  | 2.1            | 0.71-6.21 | 0.18         |
| TILs 5-50% (hydrophobic vs. all other)           | 7 vs. 90        | 4 vs. 27  | 2.76           | 0.96-7.92  | <b>0.059</b> | 14 vs. 110        | 6 vs. 20  | 2.69           | 1.08-6.71 | <b>0.034</b> |
| TILs 0-5% (hydrophobic vs. all other)            | 6 vs. 13        | 5 vs. 3   | 11.99          | 2.76-52.16 | <0.001       | 2 vs. 34          |           | not comparable |           |              |
| continuous TILs (5% increments), hydrophobic     | -               | -         | 0.84           | 0.65-1.07  | 0.16         | -                 | -         | 0.94           | 0.71-1.23 | 0.64         |
| continuous TILs, all other                       | -               | -         | 0.95           | 0.86-1.05  | 0.29         | -                 | -         | 0.84           | 0.73-0.96 | <b>0.012</b> |
| conitnuous TILs, 0-3 LN, all hydrophobic         | -               | -         | 0.84           | 0.62-1.14  | 0.25         | -                 | -         | 0.9            | 0.62-1.29 | 0.56         |
| conitnuous TILs, 0-3 LN, all other               | -               | -         | 1              | 0.89-1.13  | 0.97         | -                 | -         | 0.87           | 0.72-1.06 | 0.18         |
| conitnuous TILs, ≥4 LN, all hydrophobic          | -               | -         | 0.81           | 0.58-1.12  | 0.2          | -                 | -         | 0.92           | 0.71-1.19 | 0.51         |
| conitnuous TILs, ≥4 LN, all other                | -               | -         | 0.9            | 0.75-1.08  | 0.27         | -                 | -         | 0.83           | 0.69-1    | 0.053        |
| CDH1 mut vs. non-mut                             | 12 vs. 121      | 5 vs. 39  | 1.22           | 0.48-3.09  | 0.68         | 7 vs. 183         | 3 vs. 44  | 1.5            | 0.46-4.86 | 0.5          |
| GATA3 mut vs. non-mut                            | 2 vs. 131       |           | not comparable |            |              | 7 vs. 183         | 1 vs. 46  | 0.46           | 0.06-3.34 | 0.44         |
| PIK3CA mut vs. non-mut                           | 11 vs. 122      | 5 vs. 39  | 1.61           | 0.63-4.08  | 0.32         | 33 vs. 157        | 10 vs. 37 | 1.32           | 0.65-2.66 | 0.44         |
| PTEN mut vs. non-mut                             | 3 vs. 130       |           | not comparable |            |              | 8 vs. 182         | 3 vs. 44  | 2.03           | 0.63-6.56 | 0.24         |
| TP53 mut vs. non-mut                             | 77 vs. 56       | 27 vs. 17 | 1.2            | 0.65-2.21  | 0.55         | 86 vs. 104        | 27 vs. 20 | 1.73           | 0.97-3.08 | 0.065        |
